# Supplementary material
Source: Springer Nature journal article supplement (https://www.springermedizin.de/resource/supplementary/12865_2008_216_MOESM5_ESM.pdf/9428762)

**A****Day 0****Day 7****Day 14**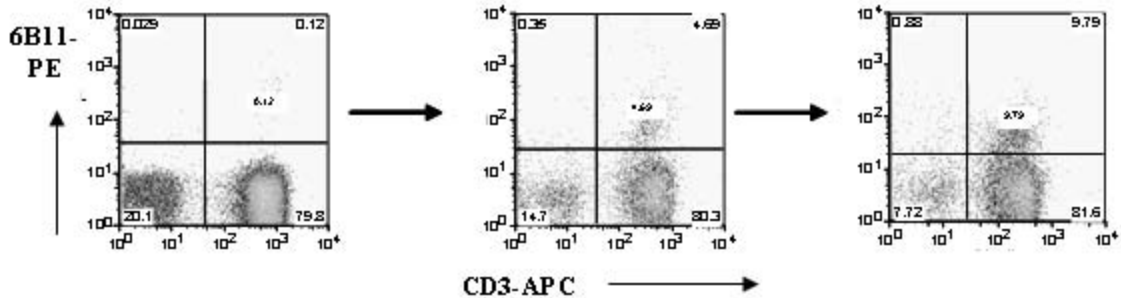

Supplement: MOESM5 [file 9428762]
